# Supplementary material for: Incidentally identified genetic variants in arrhythmogenic right ventricular cardiomyopathy‐associated genes among children undergoing exome sequencing reflect healthy population variation
Source: PubMed Central journal article supplement (PMC6565596; doi:10.1002/mgg3.593), 2019-04-15
Supplement: MGG3-7-e593-s001.pdf [file MGG3-7-e593-s001.pdf]

**A**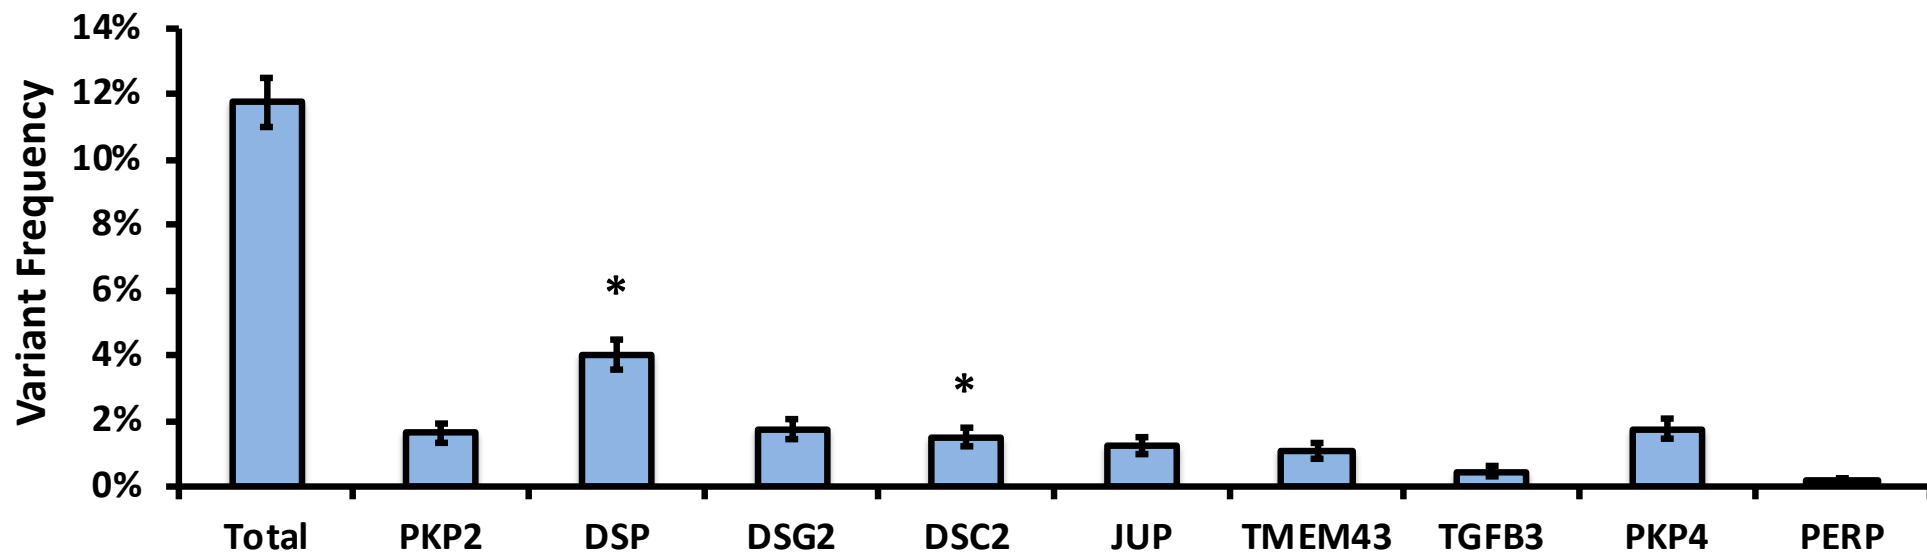**B**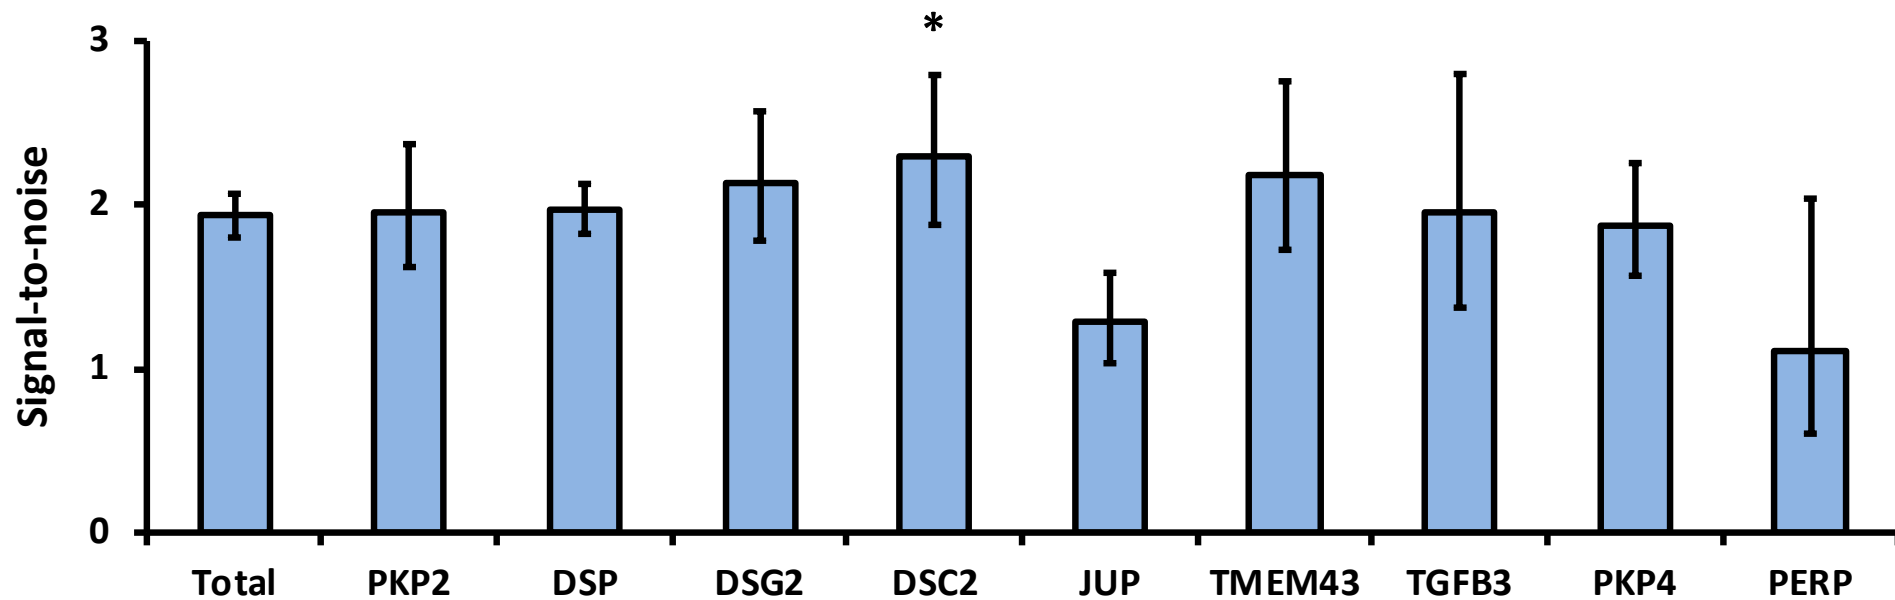

ClinVar-verified WES

|      |      |      |      |      |      |      |      |      |      |
|------|------|------|------|------|------|------|------|------|------|
| 1.93 | 1.96 | 1.97 | 2.14 | 2.29 | 1.28 | 2.18 | 1.96 | 1.88 | 1.11 |
|------|------|------|------|------|------|------|------|------|------|
