# Supplementary material for: Incidentally identified genetic variants in arrhythmogenic right ventricular cardiomyopathy‐associated genes among children undergoing exome sequencing reflect healthy population variation
Source: PubMed Central journal article supplement (PMC6565596; doi:10.1002/mgg3.593), 2019-04-15

**A**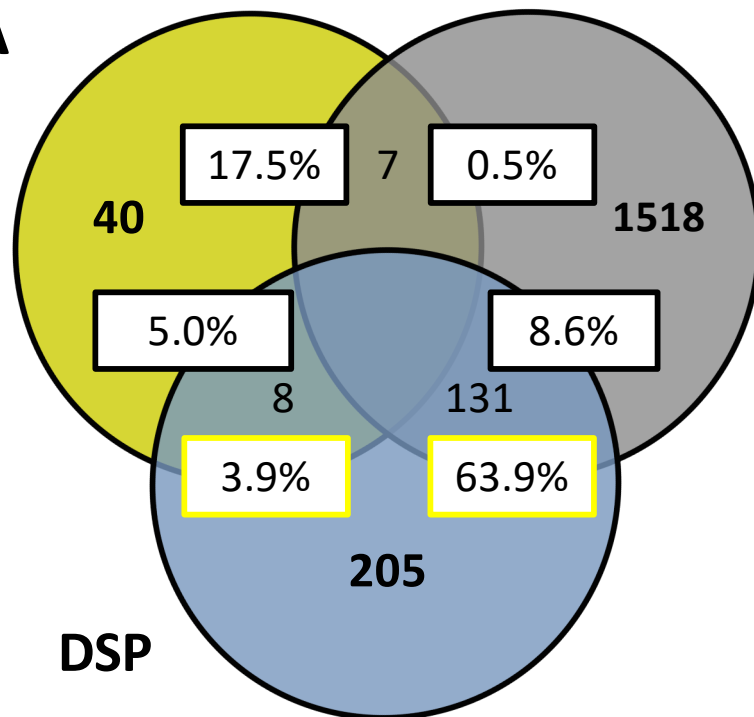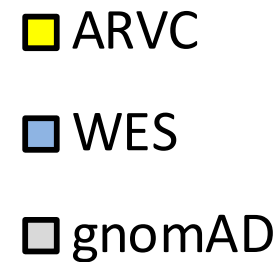**B**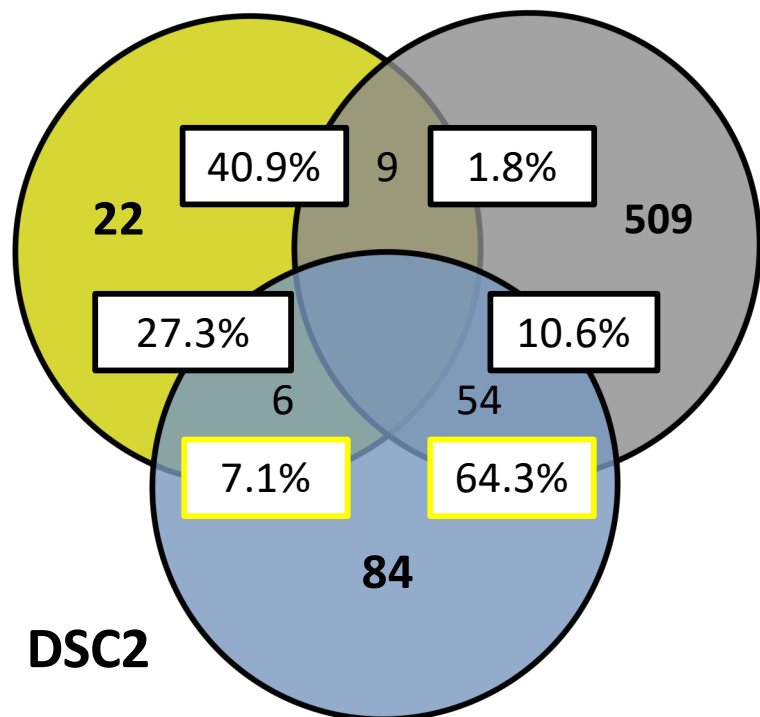**C**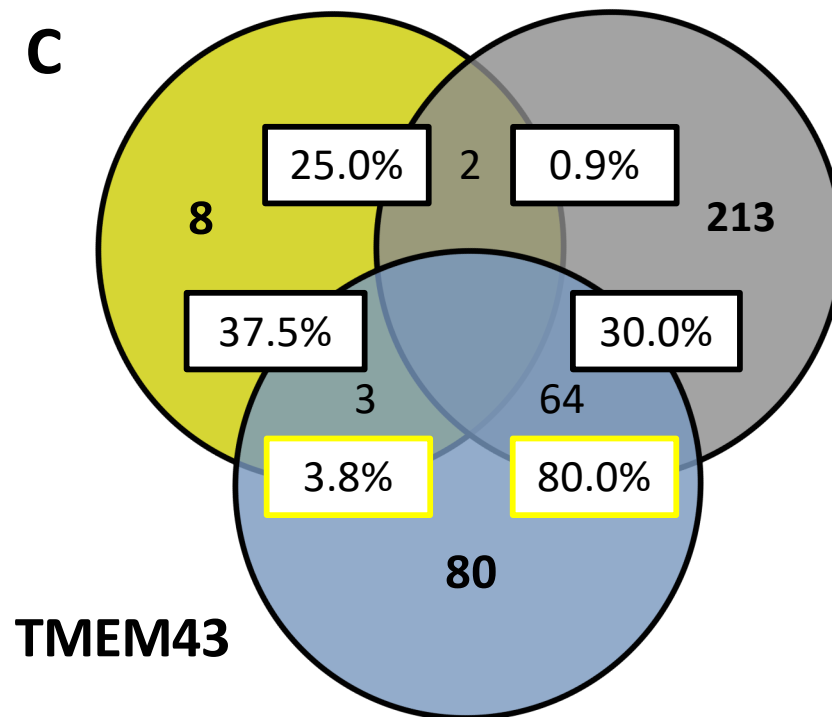

Supplement: MGG3-7-e593-s002.pdf [file MGG3-7-e593-s002.pdf]
